# Supplementary material
Source: PubMed Central journal article supplement (PMC5055751)
Supplement: NIHMS789744-supplement-1.pdf [file NIHMS789744-supplement-1.pdf]

## **Supplementary Information**

### **Biophysical Determinants for Cellular Uptake of Hydrocarbon-Stapled Peptide Helices**

Gregory H. Bird<sup>1</sup>, Emanuele Mazzola<sup>2</sup>, Kwadwo Opoku-Nsiah<sup>1</sup>, Margaret A. Lammert<sup>1</sup>,  
Marina Godes<sup>1</sup>, Donna S. Neuberg<sup>2</sup>, and Loren D. Walensky<sup>1</sup>

<sup>1</sup>Department of Pediatric Oncology, Linde Program in Cancer Chemical Biology, Dana-Farber Cancer Institute, 450 Brookline Avenue, Boston, MA 02215

<sup>2</sup>Department of Biostatistics and Computational Biology, Dana-Farber Cancer Institute, 450 Brookline Avenue, Boston, MA 02215

## Supplementary Results

### Supplementary Tables

|            |                                                                         | Hydrophobicity | Retention Time | % Alpha-Helicity | Net Charge | pI   |
|------------|-------------------------------------------------------------------------|----------------|----------------|------------------|------------|------|
| BIM BH3    | IWIAQELRRIGDEFNAYYARR                                                   | 0.337          | 9.2            | 29               | 1          | 9.14 |
| BIM SAHB1  | XWIA <del>X</del> ELRRIGDEFNAYYARR                                      | 0.424          | 9.5            | 50               | 1          | 9.14 |
| BIM SAHB2  | I <del>X</del> IAQ <del>X</del> LRRIGDEFNAYYARR                         | 0.422          | 9.9            | 32               | 2          | 9.78 |
| BIM SAHB3  | IW <del>X</del> AQ <del>E</del> <del>X</del> RRIGDEFNAYYARR             | 0.332          | 9.2            | 94               | 1          | 9.14 |
| BIM SAHB4  | IW <del>I</del> <del>X</del> QEL <del>X</del> RIGDEFNAYYARR             | 0.532          | 11.3           | 86               | 0          | 8.73 |
| BIM SAHB5  | IWIA <del>X</del> ELR <del>X</del> IGDEFNAYYARR                         | 0.558          | 9.9            | 48               | 0          | 8.73 |
| BIM SAHB6  | IWIAQ <del>X</del> LRR <del>X</del> GDEFNAYYARR                         | 0.444          | 9.8            | 88               | 2          | 9.78 |
| BIM SAHB7  | IWIAQ <del>E</del> <del>X</del> RR <del>I</del> <del>X</del> DEFNAYYARR | 0.418          | 10.1           | 43               | 1          | 9.14 |
| BIM SAHB8  | IWIAQEL <del>X</del> RIG <del>X</del> EFNAYYARR                         | 0.584          | 10.9           | 60               | 1          | 9.41 |
| BIM SAHB9* | IWIAQELR <del>X</del> IGD <del>X</del> FNAYYARR                         | 0.578          | 10.1           | 63               | 1          | 9.39 |
| BIM SAHB10 | IWIAQELRR <del>X</del> GDE <del>X</del> NAYYARR                         | 0.328          | 9.3            | 77               | 1          | 9.14 |
| BIM SAHB11 | IWIAQELRR <del>I</del> <del>X</del> DEF <del>X</del> AYYARR             | 0.528          | 10.7           | 100              | 1          | 9.14 |
| BIM SAHB12 | IWIAQELRRIG <del>X</del> EFN <del>X</del> YYARR                         | 0.521          | 8.9            | 48               | 2          | 9.80 |
| BIM SAHB13 | IWIAQELRRIGD <del>X</del> FN <del>X</del> AYYARR                        | 0.484          | 9.8            | 84               | 2          | 9.73 |
| BIM SAHB14 | IWIAQELRRIGDE <del>X</del> NAY <del>X</del> ARR                         | 0.368          | 9.6            | 100              | 1          | 9.03 |
| BIM SAHB15 | IWIAQELRRIGDEF <del>X</del> AYY <del>X</del> RR                         | 0.513          | 10.2           | 36               | 1          | 9.14 |
| BIM SAHB16 | IWIAQELRRIGDEFN <del>X</del> YY <del>X</del> RR                         | 0.532          | 10.1           | 40               | 0          | 8.73 |
| BIM SAHB17 | IWIAQELRRIGDEFNA <del>X</del> YAR <del>X</del>                          | 0.501          | 10.5           | 88               | 0          | 8.53 |

\*BIM SAHB<sub>A1</sub>

**Supplementary Table 1. Sequence composition and biophysical parameters of a BIM BH3 staple scanning library.** Hydrophobicity was calculated as described<sup>1</sup>, with X assigned the hydrophobicity value of Leu. Retention time in minutes reflects the peptide elution time from an HPLC C18 column (Agilent, 1200) run for 20 minutes using a 5-95% water:acetonitrile gradient (10 mM ammonium carbonate). Percent  $\alpha$ -helicity of stapled peptides (50  $\mu$ M, 10% acetonitrile in water) was derived from circular dichroism spectra using the mdeg value at 222 nm, as described<sup>2</sup>. Net charge was calculated by summing the positive and negative charges of Arg and Asp/Glu, respectively. The isoelectric point (pI) calculation employed the EMBOSS values for pKa.

BIM BH3 Staple Walk - Principal Components (Eigenvectors)

| Variable           | Comp1   | Comp2   | Comp3  | Unexplained |
|--------------------|---------|---------|--------|-------------|
| pH7 retention time | 0.6945  | 0.0137  | 0.1104 | 0.1305      |
| percent helicity   | 0.1656  | -0.7771 | 0.5604 | 0.01413     |
| pl                 | -0.3947 | 0.4044  | 0.7843 | 0.01693     |
| hydrophobicity     | 0.5783  | 0.4821  | 0.2422 | 0.0967      |

| Component | Eigenvalue | Difference | Proportion | Cumulative |
|-----------|------------|------------|------------|------------|
| 1         | 1.78087    | 0.672352   | 0.4452     | 0.4452     |
| 2         | 1.10852    | 0.256167   | 0.2771     | 0.7223     |
| 3         | 0.852352   | 0.594095   | 0.2131     | 0.9354     |

**Supplementary Table 2. Principal component analysis of biophysical parameters impacting the variability of a staple scanning BIM BH3 library.** The overall variability in the data can be explained by the cumulative contributions of hydrophobicity/HPLC retention time (component 1), percent  $\alpha$ -helicity (component 2), and pl (component 3).

|                   |                       | Hydrophobicity | Retention Time | % Alpha-Helicity | Net Charge | pI    |
|-------------------|-----------------------|----------------|----------------|------------------|------------|-------|
| BIM SAHB9 (Q150L) | IWIALELRXIGDXFNAYYARR | 0.669          | 10.7           | 64               | 1          | 9.39  |
| BIM SAHB9 (E151L) | IWIAQLLRXIGDXFNAYYARR | 0.689          | 12.0           | 67               | 2          | 10.27 |
| BIM SAHB9 (R153L) | IWIAQELLXIGDXFNAYYARR | 0.707          | 11.2           | 59               | 0          | 8.87  |
| BIM SAHB9 (D157L) | IWIAQELRXIGLXFNAYYARR | 0.695          | 10.0           | 54               | 2          | 10.30 |
| BIM SAHB9 (W147L) | ILIAQELRXIGDXFNAYYARR | 0.551          | 10.1           | 69               | 1          | 9.39  |
| BIM SAHB9 (A161L) | IWIAQELRXIGDXFNLYYARR | 0.644          | 10.3           | 61               | 1          | 9.39  |
| BIM SAHB9 (Y162L) | IWIAQELRXIGDXFNALYARR | 0.613          | 10.7           | 58               | 1          | 9.27  |
| BIM SAHB9 (W147E) | IEIAQELRXIGDXFNAYYARR | 0.440          | 9.6            | 53               | 0          | 8.73  |
| BIM SAHB9 (Y162E) | IWIAQELRXIGDXFNAEYARR | 0.501          | 10.1           | 51               | 0          | 8.53  |
| BIM SAHB9 (A161R) | IWIAQELRXIGDXFNRYYARR | 0.515          | 9.7            | 95               | 2          | 9.78  |
| BIM SAHB9 (Y162R) | IWIAQELRXIGDXFNARYARR | 0.484          | 9.3            | 50               | 2          | 9.73  |
| BIM SAHB9 (R153D) | IWIAQELDXIGDXFNAYYARR | 0.589          | 10.8           | 21               | -1         | 8.16  |
| BIM SAHB9 (I155E) | IWIAQELRXEGDXFNAYYARR | 0.461          | 9.0            | 85               | 0          | 8.73  |
| BIM SAHB9 (A164T) | IWIAQELRXIGDXFNAYYTRR | 0.575          | 10.4           | 100              | 1          | 9.39  |
| BIM SAHB9 (W147R) | IRIAQELRXIGDXFNAYYARR | 0.422          | 8.8            | 66               | 2          | 9.78  |
| BIM SAHB9 (A161E) | IWIAQELRXIGDXFNEYARR  | 0.532          | 10.3           | 85               | 0          | 8.73  |
| BIM SAHB9 (Y162T) | IWIAQELRXIGDXFNATYARR | 0.544          | 10.2           | 52               | 1          | 9.27  |
| BIM SAHB9 (G157E) | IWIAQELRXIEDXFNAYYARR | 0.547          | 10.2           | 65               | 0          | 8.73  |
| BIM SAHB9 (F159V) | IWIAQELRXIGDXVNAYYARR | 0.550          | 10.3           | 50               | 1          | 9.39  |

**Supplementary Table 3. Sequence composition and biophysical parameters of a BIM SAHB<sub>A1</sub> mutagenesis library.** Parameters were calculated or experimentally-derived as described for Supplementary Table 1.

BIM BH3 Point Mutants - Principal Components (Eigenvectors)

| Variable           | Comp1   | Comp2   | Comp3   | Unexplained |
|--------------------|---------|---------|---------|-------------|
| pH7 retention time | 0.6692  | -0.1098 | 0.3233  | 0.06539     |
| percent helicity   | -0.1788 | 0.6880  | 0.7017  | 0.00035     |
| pI                 | 0.1946  | 0.7125  | -0.6332 | 0.08204     |
| hydrophobicity     | 0.6946  | 0.0833  | 0.0465  | 0.07633     |

| Component | Eigenvalue | Difference | Proportion | Cumulative |
|-----------|------------|------------|------------|------------|
| 1         | 1.89333    | 0.620503   | 0.4733     | 0.4733     |
| 2         | 1.27283    | 0.589094   | 0.3182     | 0.7915     |
| 3         | 0.68373    | 0.533615   | 0.1709     | 0.9625     |

**Supplementary Table 4. Principal component analysis of biophysical parameters impacting the variability of a BIM SAHB<sub>A1</sub> point mutant library.** The overall variability in the data can be explained by the cumulative contributions of hydrophobicity/HPLC retention time (component 1), pI (component 2), and percent  $\alpha$ -helicity (component 3).

## Supplementary Figures

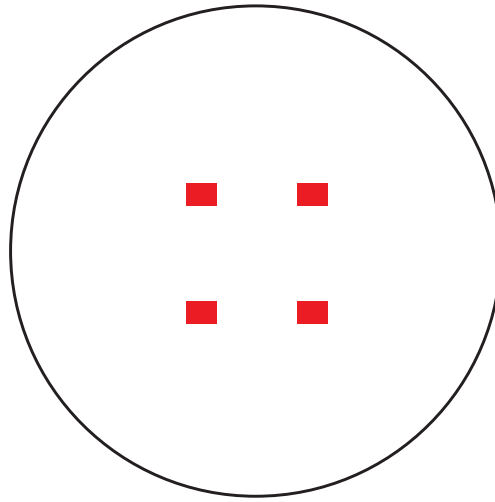

**Supplementary Figure 1. Microscopic imaging field.** Acquisition points (red) in the microscopic field (circle) for measuring total internalized FITC intensity on a per cell basis in 96 well format by IXM at 20x magnification.

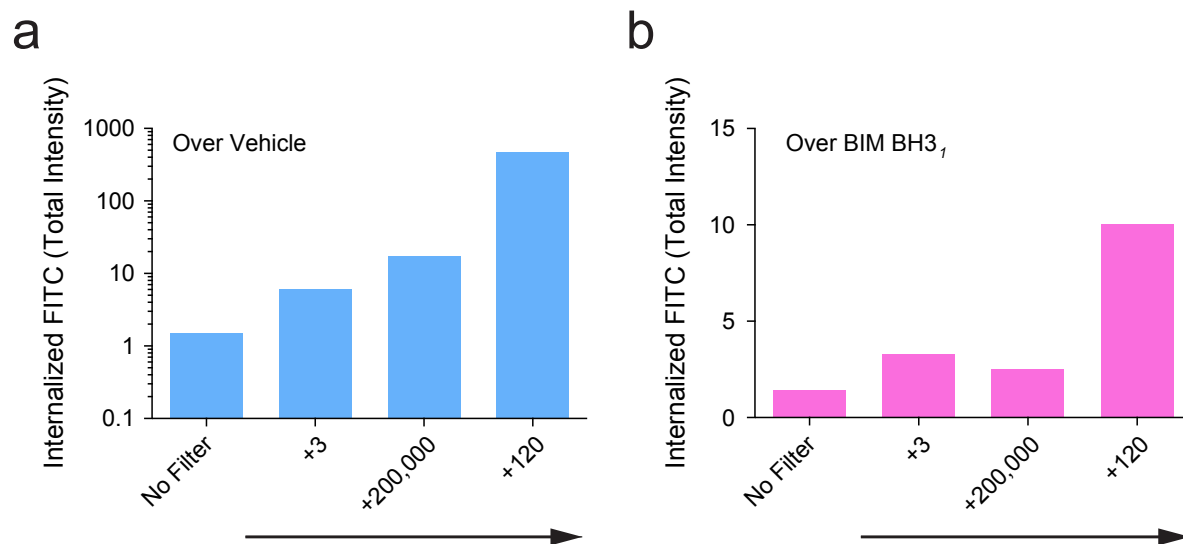

**Supplementary Figure 2. Optimization of signal-to-noise ratios for fluorescence measurements.** A custom module (CM) was designed to maximize signal-to-noise detection of FITC-stapled peptides for optimal sensitivity and specificity of internalized peptide measurement. From left to right, the first bar represents no filter followed by the cumulative addition of (1) a threshold intensity signal requirement of 3 over local background, (2) a threshold intensity requirement for objects (cells) having total intensity per cell of 200,000, and (3) a threshold intensity requirement for objects (cells) displaying an average intensity per cell of 120. Applying this CM, internalized FITC-stapled peptide was well discerned with respect to (a) DMSO and (b) unmodified template peptide.

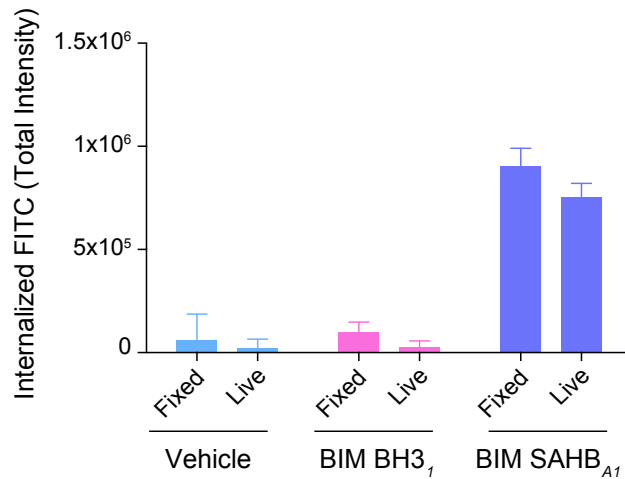

**Supplementary Figure 3. Effect of cell fixation on TIFI.** Cell fixation with 4% paraformaldehyde had no effect on TIFI when compared to acquisition and analysis using live cells treated with DMSO, BIM BH3<sub>1</sub>, or BIM SAHB<sub>A1</sub>. Data are mean  $\pm$  s.d. for experiments performed in technical quadruplicate for vehicle and BIM BH3<sub>1</sub>, and octuplicate for BIM SAHB<sub>A1</sub>, with 4 image acquisitions per well. Three biological replicates were performed for each experiment with similar results.



**a**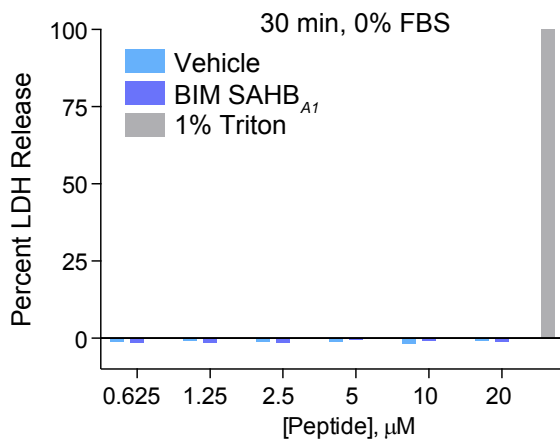**b**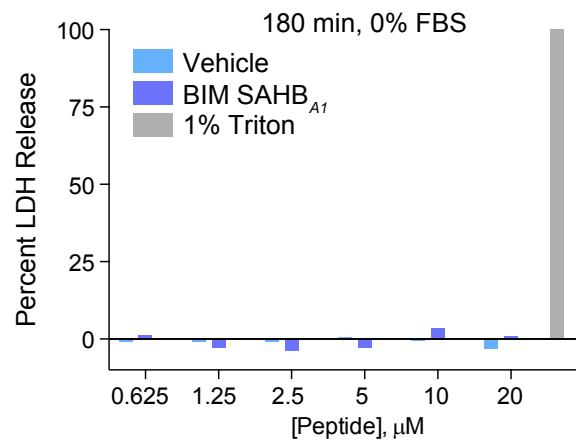

**Supplementary Figure 4. Effect of BIM SAHB<sub>A1</sub> on plasma membrane integrity.** MEFs ( $2 \times 10^4$  cells/well) were subjected to a serial dilution of BIM SAHB<sub>A1</sub> for (a) 30 min and (b) 180 min in media lacking serum. No cellular lysis was observed, as measured by LDH release assay. Treatment with 1% Triton X-100 served as the positive control for maximal release. BIM SAHB<sub>A1</sub> treatments were performed in technical duplicate and the experiment was repeated twice.

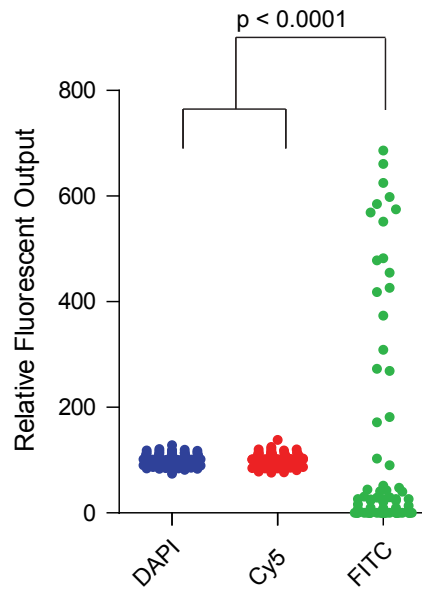

**Supplementary Figure 5. Variation in detected fluorescence signals upon stapled peptide treatment.** There was no change in acquired DAPI and Cy5 channels upon treating MEFs with fluorescent stapled peptides. Variation was only observed in the FITC channel, consistent with expected differences in cellular uptake propensity for stapled peptides bearing alternatively placed staples and point mutations. Intensities were scaled such that the mean of each channel was set to 100. Each dot within a given cluster represents the fluorescence from a distinct well of a 96-well plate. p-value was determined by Kruskal-Wallis test.

a

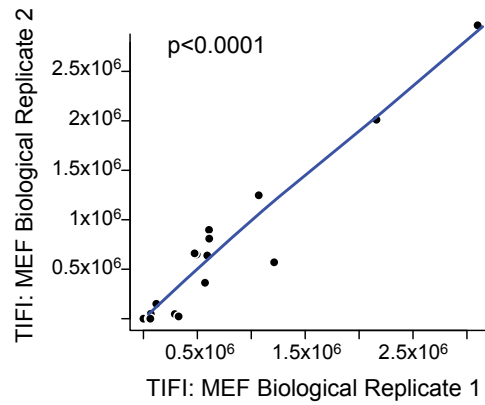

b

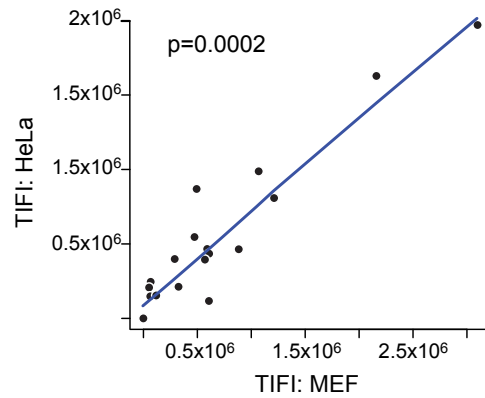

**Supplementary Figure 6. Association between TIFI values measured in biological replicates and in distinct cell lines.** The TIFI values for cellular uptake of BIM SAHB peptides between (a) biological replicates and (b) MEF vs. HeLa cells are strongly associated, as assessed by Spearman's rank correlation. Each dot represents a distinct stapled peptide from the staple walk library. p-values were calculated using the permutation test included in the R package pvrnk, and line fitting was performed using a loess smoother.

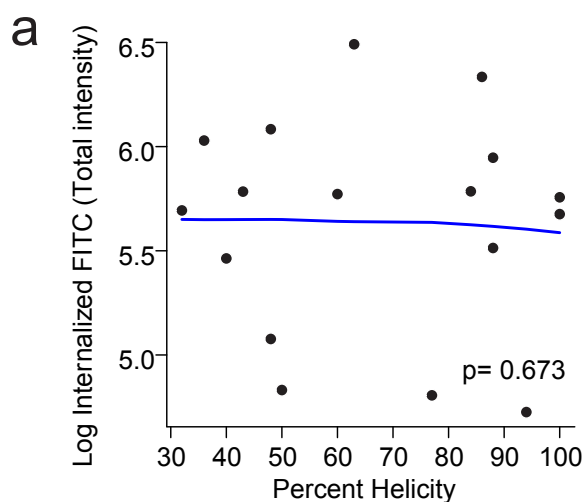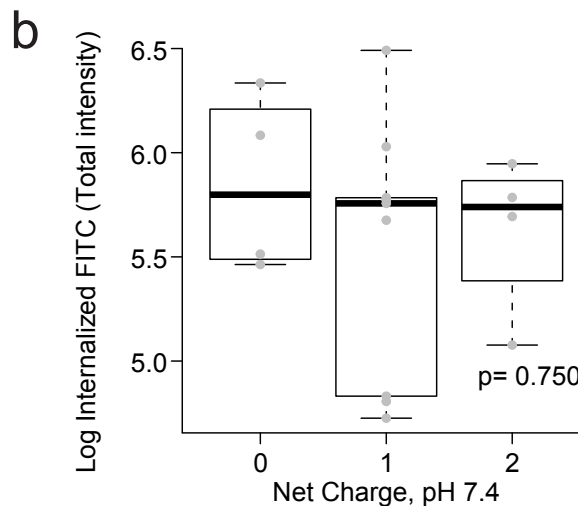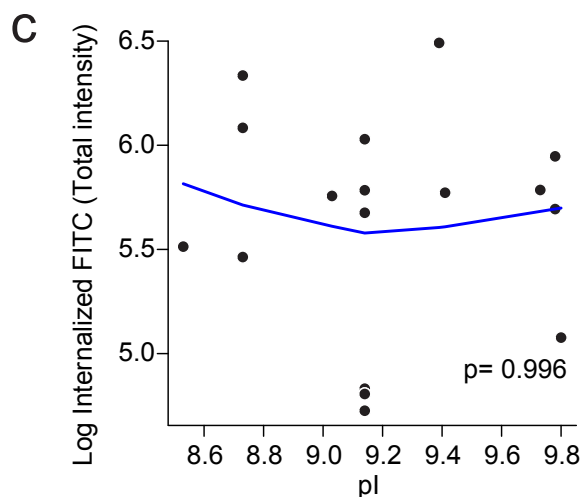

**Supplementary Figure 7. Determinants of cellular uptake for differentially stapled BIM BH3 peptides.** Single variable plots for TIFI vs. (a) percent  $\alpha$ -helicity, (b) net charge at pH 7.4, and (c) pI, as assessed by Spearman's rank correlation (a, c) or Kruskal-Wallis test (b). p-values were calculated using the permutation test included in the R package pvrnk, and line fitting was performed using a loess smoother (a, c).

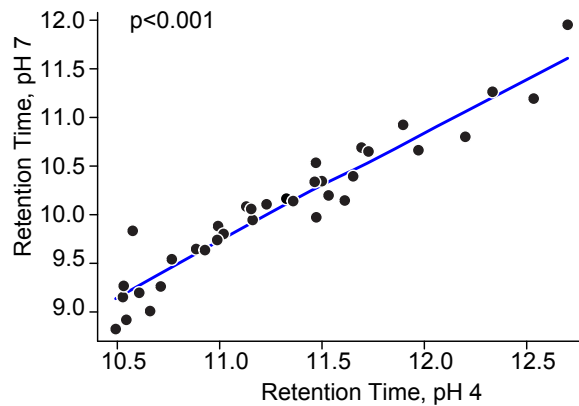

**Supplementary Figure 8. Association between peptide retention time measurements at pH 4 and 7.** Retention times were experimentally determined for each stapled peptide using pH 4 and pH 7 HPLC buffer conditions. The retention time values for both conditions are highly associated, as assessed by Spearman's rank correlation. Each dot represents a distinct stapled peptide from the staple walk and point mutant libraries. p-values were calculated using the permutation test included in the R package pvrnk, and line fitting was performed using a loess smoother.

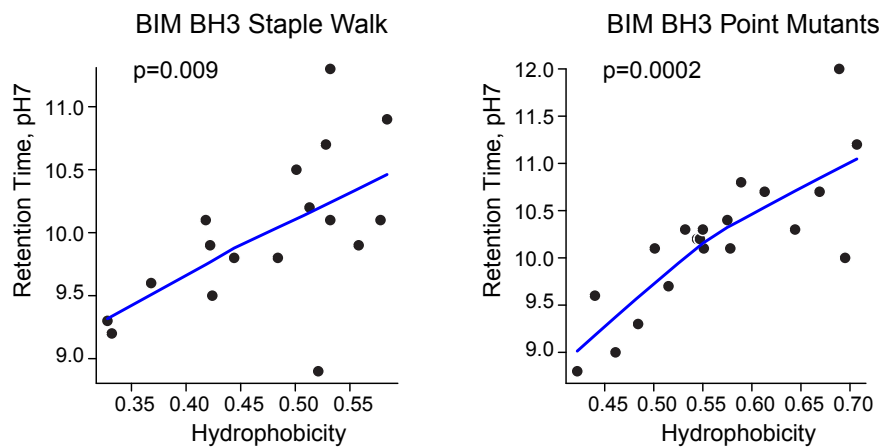

**Supplementary Figure 9. Relationship between peptide hydrophobicity and retention time at pH 7.** The calculated hydrophobicity and experimentally-determined HPLC retention time (pH 7) are strongly associated by Spearman's rank correlation for BIM BH3 peptides in both the staple walk (left) and point mutant (right) libraries. p-values were calculated using the permutation test included in the R package pvrnk, and line fitting was performed using a loess smoother.

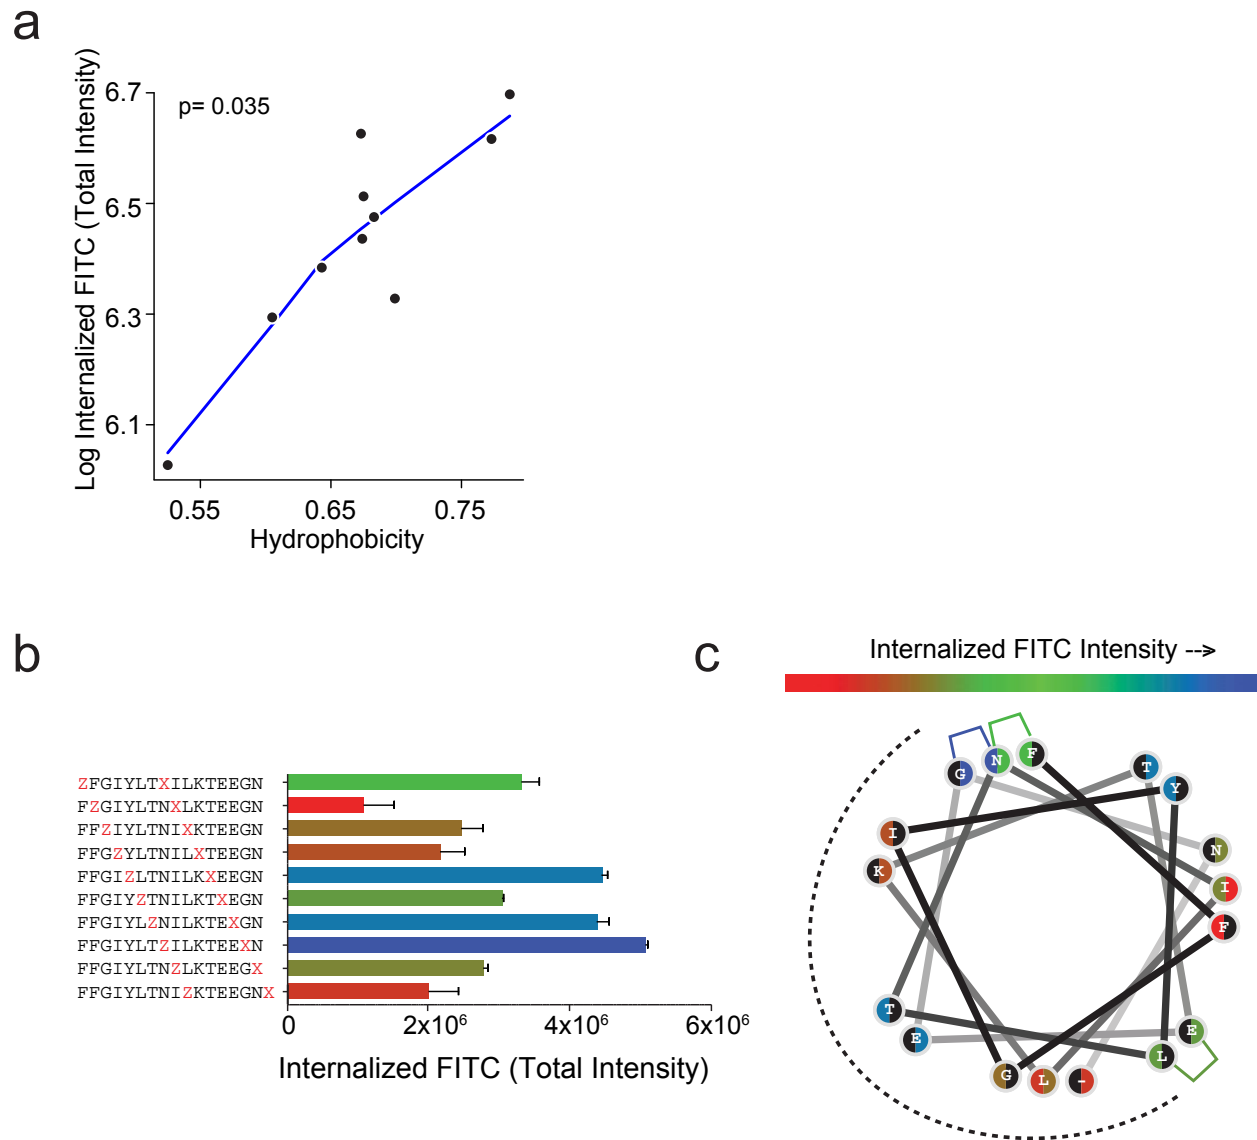

**Supplementary Figure 10. Cellular uptake of differentially stapled SOS1 peptides.** (a) Single variable plot for TIFI vs. calculated hydrophobicity of SOS1 peptides (aa 929-944) bearing sequentially placed *i*, *i*+7 staples, as assessed by Spearman's rank correlation. p-value was calculated using the permutation test included in the R package pvrnk, and line fitting was performed using a loess smoother. (b) Range of TIFI for MEFs ( $2 \times 10^4$ /well) treated with 500 nM peptides and measured by IXM (20x) at 4 hours. Data are mean  $\pm$  s.d. for experiments performed in duplicate wells with 4 image acquisitions per well. Three biological replicates were performed with similar results. Z, R-octenyl alanine; X, S-pentenyl alanine. (c) Wheel depiction of the SOS1  $\alpha$ -helix, with the KRAS-interaction face indicated by the dotted surface and stapling amino acid pairs color-coded based on level of measured TIFI. Residues that participate in two distinct staples are shown as split circles, with the left and right colors corresponding to their roles in N- vs. C-terminal staples, respectively.

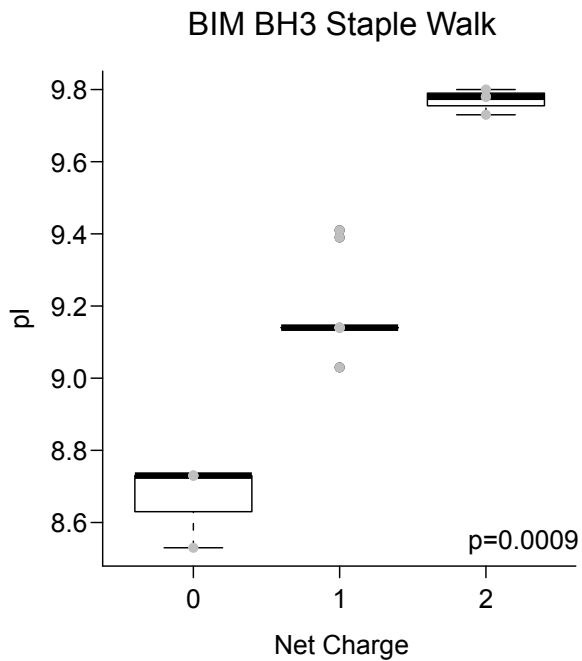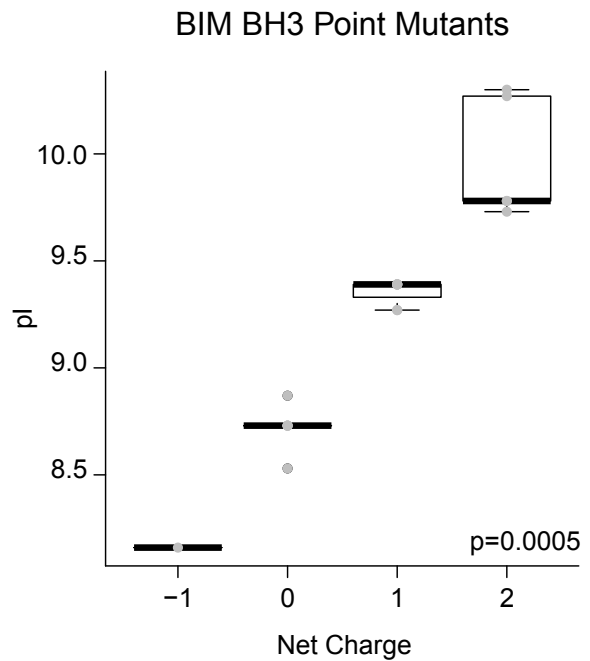

**Supplementary Figure 11. Relationship between peptide net charge and isoelectric point.** The calculated net charge and pI parameters are highly associated based on Kruskal-Wallis test for BIM BH3 peptides in both the staple walk (left) and point mutant (right) libraries.



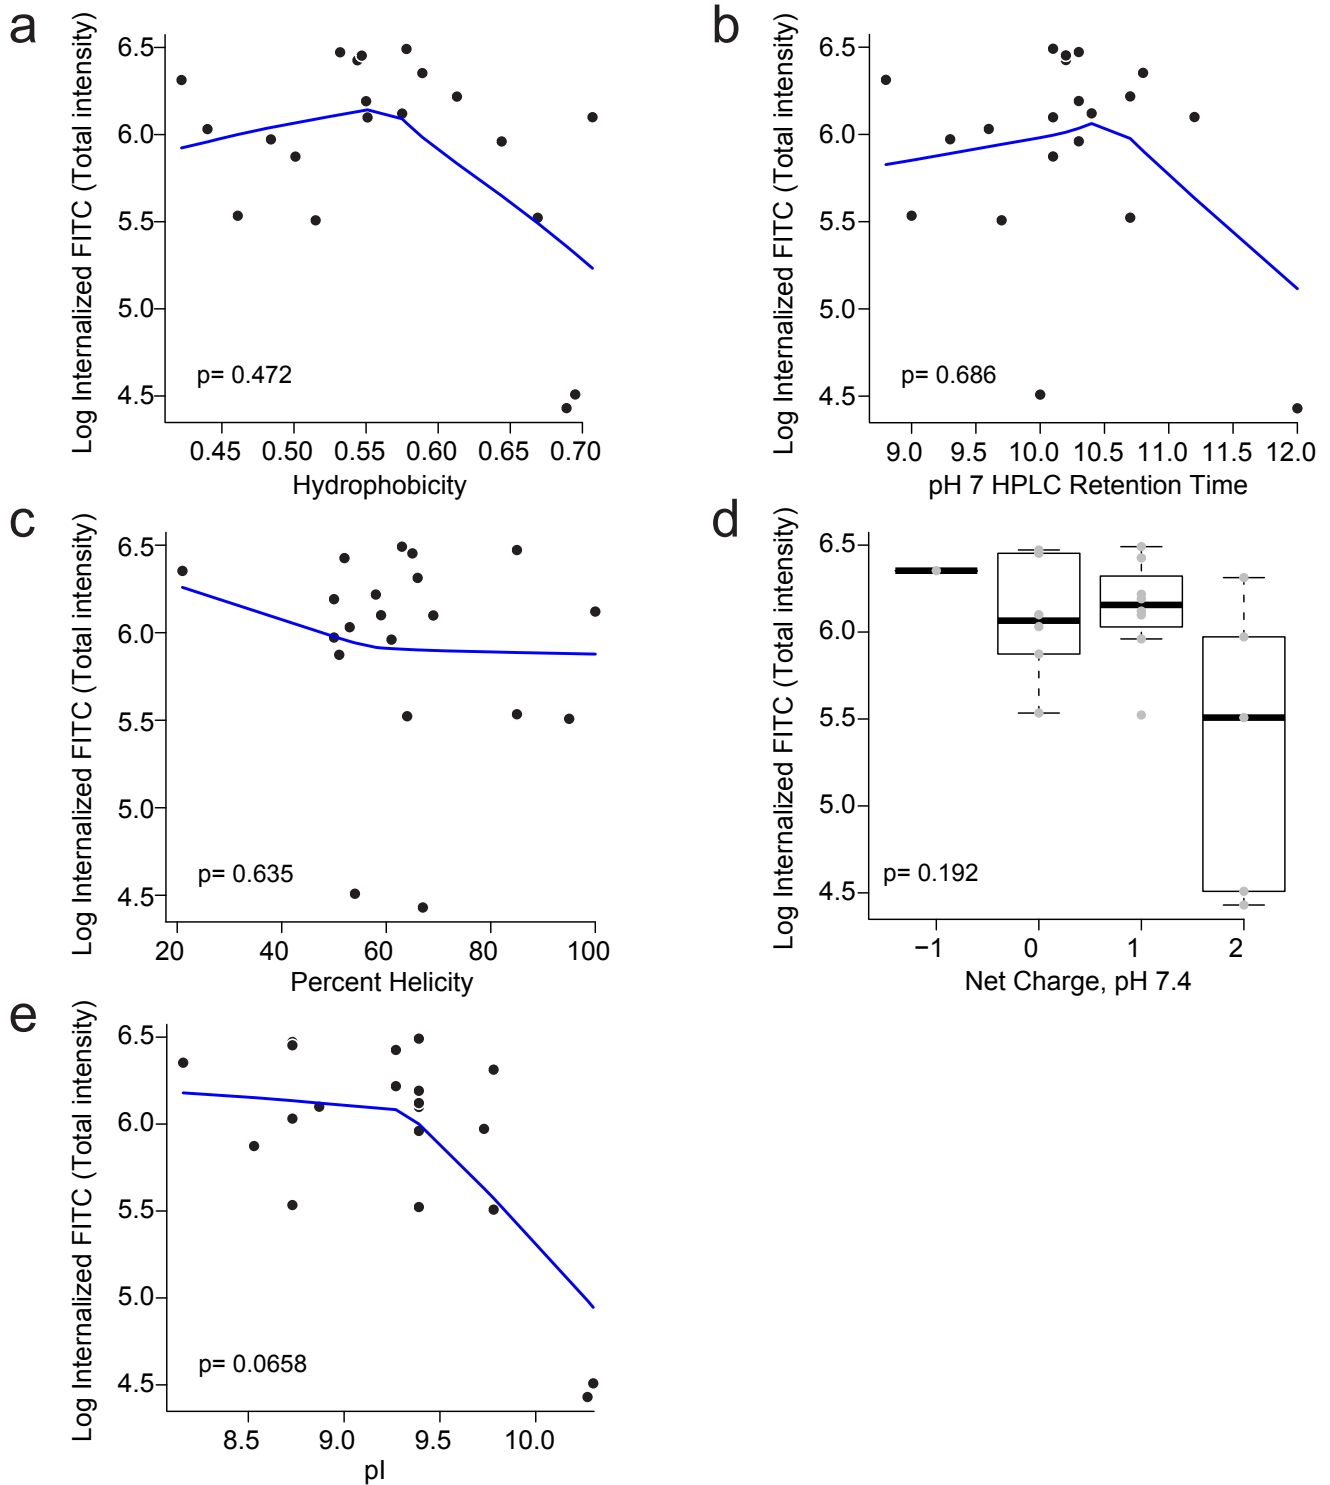

**Supplementary Figure 12. Impact of point mutagenesis on the cellular uptake of BIM SAHB<sub>A1</sub>.** (a-e) Single variable plots for TIFI vs. (a) calculated hydrophobicity, (b) HPLC retention time (pH 7), (c) percent  $\alpha$ -helicity, (d) net charge at pH 7.4, and (e) pI, as assessed by Spearman's rank correlation (a-c, e) or Kruskal-Wallis test (d). p-values were calculated using the permutation test included in the R package pvrnk, and line fitting was performed using a loess smoother (a-c, e).

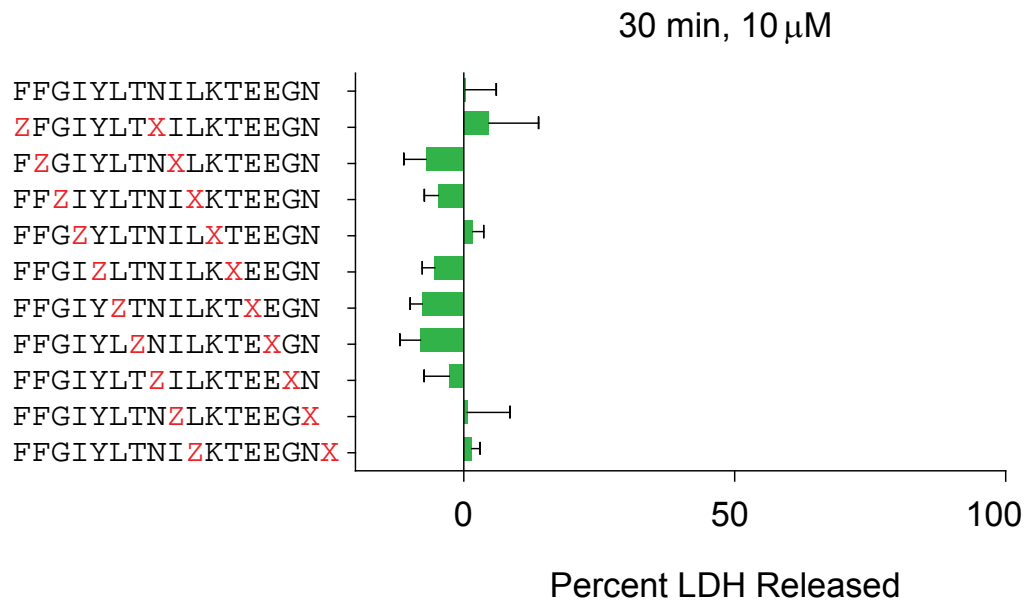

**Supplementary Figure 13. Cellular LDH release testing of SAH-SOS1 peptides.** A staple scanning SOS1 peptide library was screened for membrane lytic properties by LDH release assay, performed on Jurkat T-cells ( $2 \times 10^4$  cells/well) treated with 10  $\mu$ M peptide for 30 minutes in the absence of serum. Data are normalized based on the response to treatment with 1% Triton X-100 (100% release) and media alone (0% LDH release). Data are mean  $\pm$  s.d. for experiments performed in technical triplicate and repeated twice.

## Supplementary References

1. Eisenberg, D. & McLachlan, A.D. Solvation energy in protein folding and binding. *Nature* **319**, 199-203 (1986).
2. Bird, G.H., Bernal, F., Pitter, K. & Walensky, L.D. Synthesis and biophysical characterization of stabilized alpha-helices of BCL-2 domains. *Methods Enzymol* **446**, 369-86 (2008).
